# Supplementary material for: Differential seeding and propagating efficiency of α-synuclein strains generated in different conditions
Source: PubMed Central journal article supplement (PMC8215826; doi:10.1186/s40035-021-00242-5), 2021-06-21
Supplement: 40035_2021_242_MOESM1_ESM.pdf [file 40035_2021_242_MOESM1_ESM.pdf]

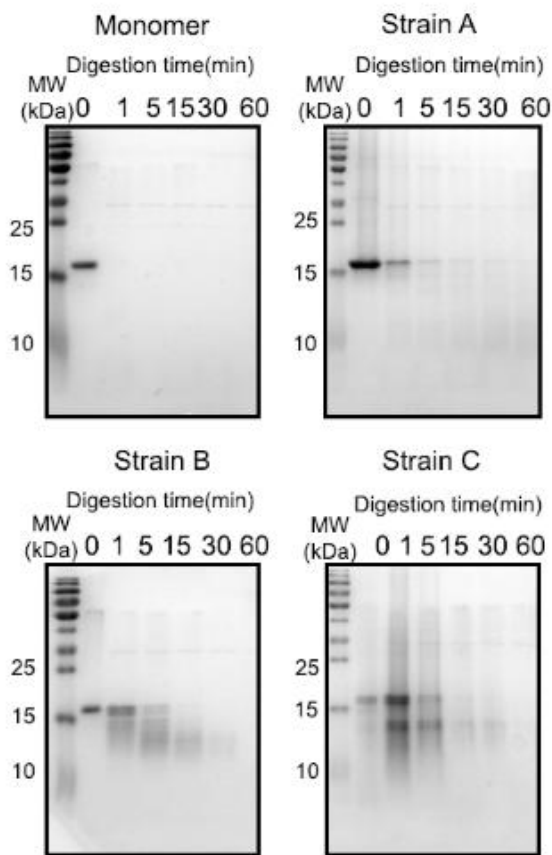

**Figure S1.** The digestion of the strains by proteinase K. Proteinase K was added and the samples were collected from 0 to 60 min. Each strain produces distinct banding profiles of insoluble  $\alpha$ -syn species, and then assessed by 15% SDS-PAGE followed by Coomassie brilliant blue staining.

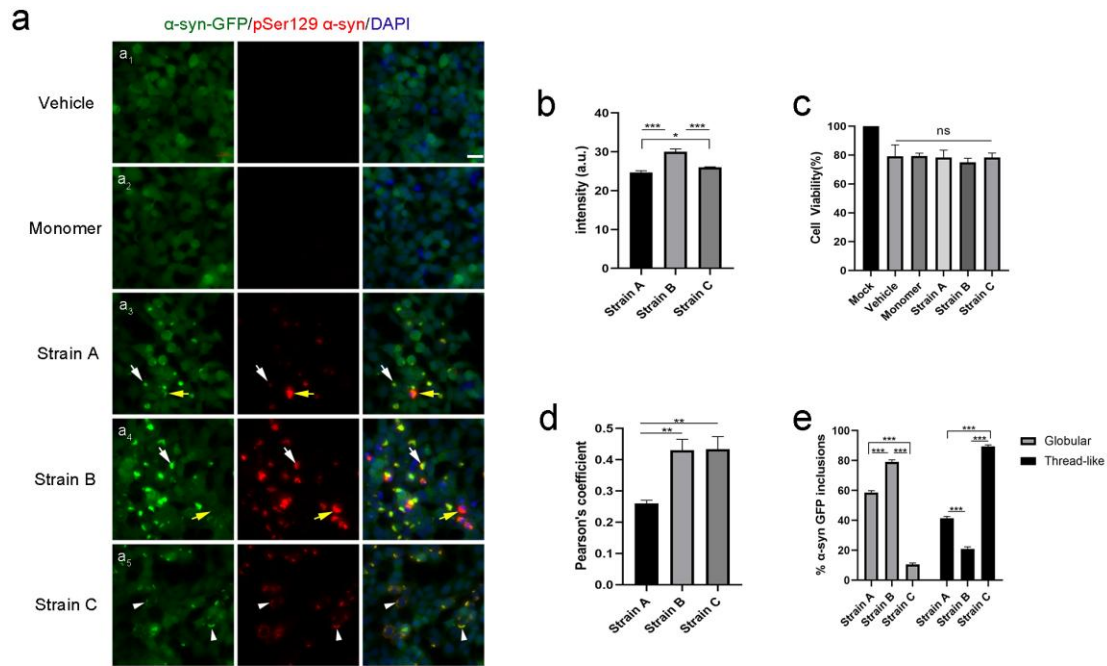

**Figure S2.**  $\alpha$ -Syn aggregation assay showing differential seeding effects in cultured  $\alpha$ -syn (A53T)-GFP cell line. **a**  $\alpha$ -Syn-GFP and immunofluorescent staining with pSer129  $\alpha$ -syn (red). Scale bar = 50  $\mu$ m. **b**  $\alpha$ -Syn-GFP intensity after exposed with  $\alpha$ -syn strains. Strain B caused the highest fluorescence intensity, which was significantly different from the other two, and the Strain C was more effective than the Strain A. Statistical analysis by One-way ANOVA (n = 3, \*  $P < 0.05$  \*\*  $P < 0.01$ ). Bar shows mean  $\pm$  SD. **c** Cell viability measured by CCK-8. The cells exposed to the three strains exhibited no significant difference compared to the vehicle group (n = 3). Bar shows mean  $\pm$  SD. **d** PCC for colocalization of pSer129  $\alpha$ -syn and  $\alpha$ -syn (A53T)-GFP aggregation. Statistical analysis by One-way ANOVA (n = 3, \*\*  $P < 0.01$ ). Bar charts show mean  $\pm$  SD. **e** Percentage of aggregation patterns (globular and thread-like) caused by the three strains. Statistical analysis by one-way ANOVA (n = 3, \*\*\*  $P < 0.001$ ). Bar shows mean  $\pm$  SD

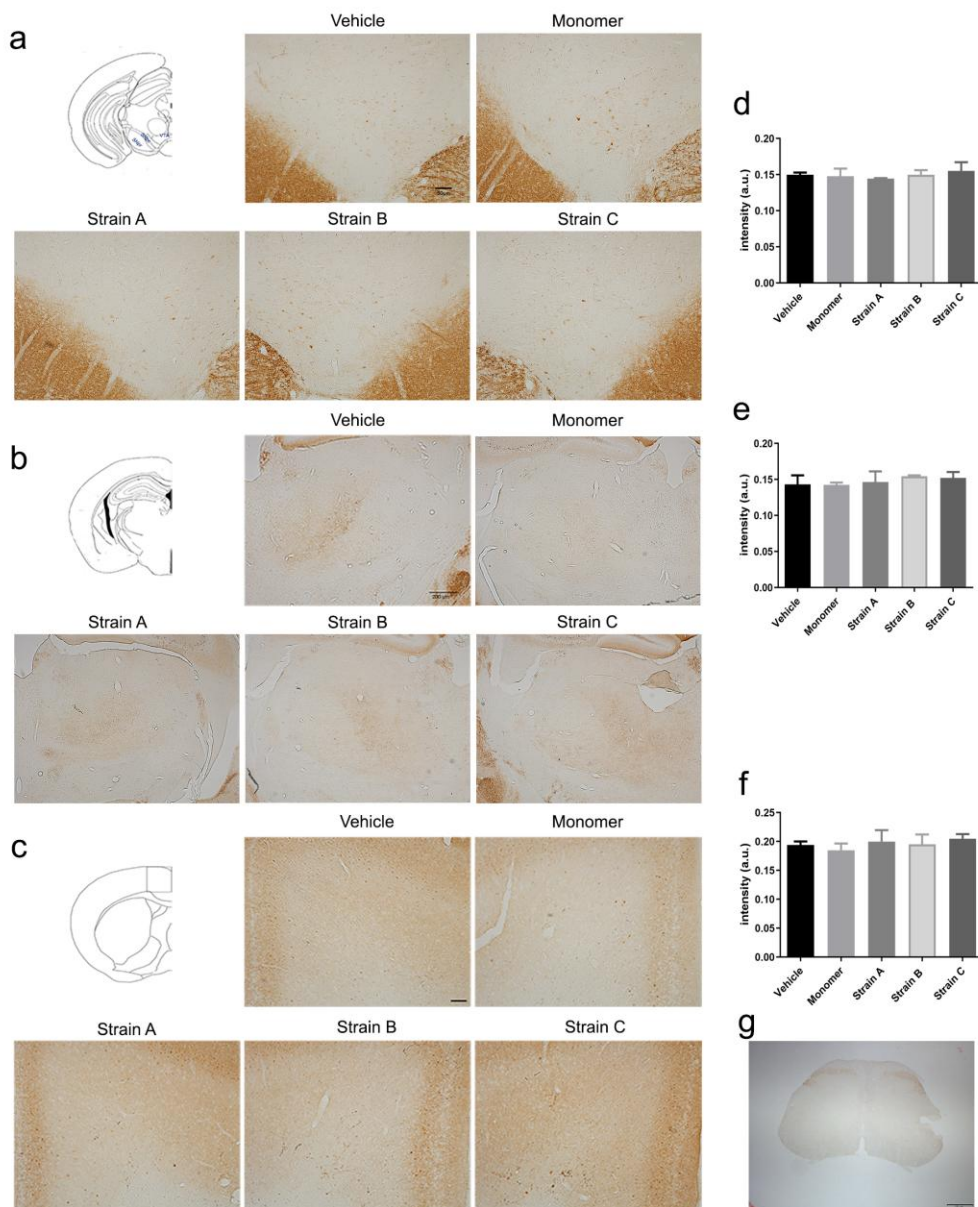

**Figure S3.** Distribution of  $\alpha$ -syn in the midbrain and forebrain of in BAC- $\alpha$ -syn-GFP mice and spinal cord in wild type mice. **a-c** Distribution of pSer 129  $\alpha$ -syn in the upper brain regions. A similar amount of endogenous  $\alpha$ -syn was accumulated in upper brain regions, the substantia nigra, thalamus, and the motor cortex, which did not increase significantly after IM injection. **d-f** Statistical analysis of brain regions by one-way ANOVA,  $n = 3$ , with Tukey's multiple comparison tests. Each bar shows mean  $\pm$  SD. **g** pSer 129  $\alpha$ -syn staining in the lumbar spinal cord in wild type mice. No

accumulation of  $\alpha$ -syn in the spinal cord in wild type mice injected with Strain B and histological analysis performed together with the BAC- $\alpha$ -syn-GFP mice. Scale bar A, C = 50  $\mu$ m. Scale bar B, G = 200  $\mu$ m.

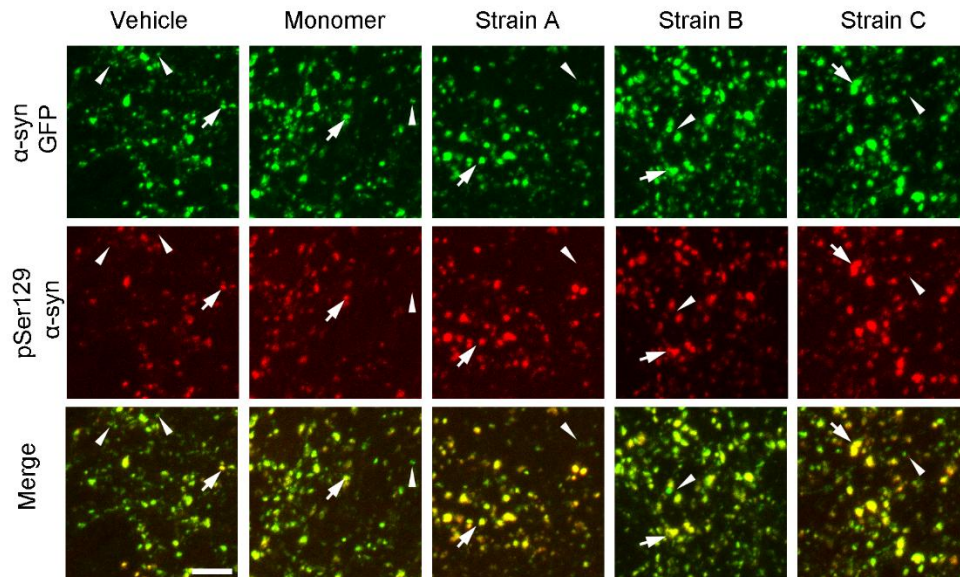

**Figure S4.** Colocalization analysis of pSer129  $\alpha$ -syn and native  $\alpha$ -syn-GFP in the lumbar spinal cord in BAC- $\alpha$ -syn-GFP mice. The native and endogenous  $\alpha$ -syn-GFP profiles (green) were mainly small granular and puncta in the lumbar spinal cord in the control group. After IM injections with  $\alpha$ -syn strains (A, B, C), large puncta and pearl-like positive profiles increased, they are largely positive for GFP (native  $\alpha$ -syn) and pSer129  $\alpha$ -syn (red) (arrows), some small puncta were only positive for GFP, but not for pSer129  $\alpha$ -syn (arrowheads). Scale bar = 10  $\mu$ m.

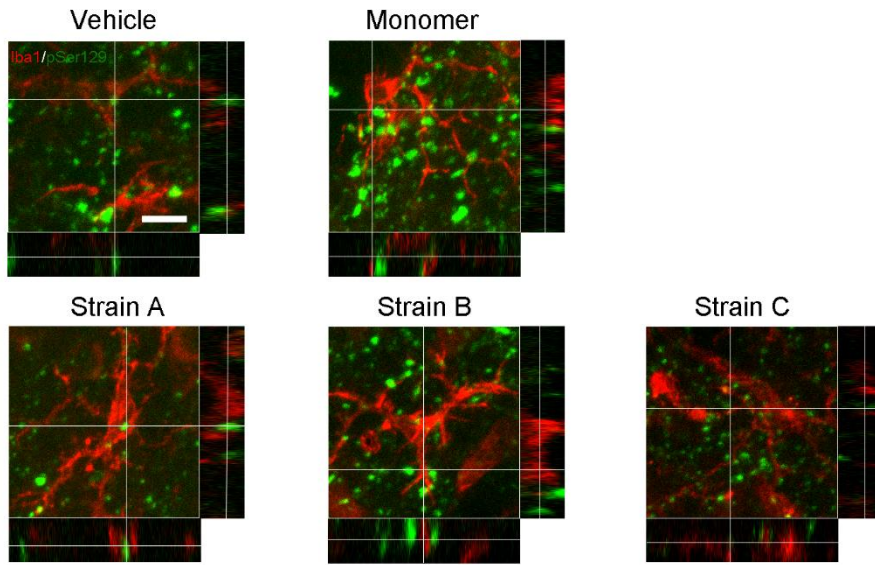

**Figure S5.** Colocalization analysis of pSer129  $\alpha$ -syn and microglia in the lumbar spinal cord in BAC- $\alpha$ -syn-GFP mice. Maximal projection of Z-stack confocal images, in which double labeling of pSer129  $\alpha$ -syn (green) and microglia (red) in each group showed pSer129  $\alpha$ -syn was not in microglia. Scale bar = 10  $\mu$ m
